# Supplementary material for: FGT-1 is the major glucose transporter in C. elegans and is central to aging pathways
Source: PubMed Central journal article supplement (PMC3898116; doi:10.1042/bj20131101), 2013-11-08
Supplement: bj4560219add.pdf [file bj4560219add.pdf]

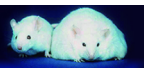

## SUPPLEMENTARY ONLINE DATA

# FGT-1 is the major glucose transporter in *C. elegans* and is central to aging pathways

Ying FENG<sup>\*1</sup>, Barnabas G. WILLIAMS<sup>†</sup>, Françoise KOUMANOV<sup>\*</sup>, Adrian J. WOLSTENHOLME<sup>†</sup> and Geoffrey D. HOLMAN<sup>\*2</sup>

<sup>\*</sup>Department of Biology and Biochemistry, University of Bath, Bath, BA2 7AY, U.K., and <sup>†</sup>Department of Infectious Diseases, University of Georgia, Athens, GA 30602, U.S.A.

**Table S1 Primers used for cloning the putative glucose transporter genes from a *C. elegans* cDNA library**

| Gene Name     | Gene size (bp) | Primer name                                    | Primer sequence (5'→3')                                                                                   |
|---------------|----------------|------------------------------------------------|-----------------------------------------------------------------------------------------------------------|
| <i>fgt-1a</i> | 1479           | H17aFOR<br>H17aREV                             | AAATGGGTGTCACGACC<br>GCATTACTTCTCTCTCG                                                                    |
| <i>fgt-1b</i> | 1533           | H17bFOR<br>H17bREV<br>H17int                   | ATGTCGGAAAATCAAGAAGTG<br>TACTTCTCTCTCGAATTCCG<br>GGCCACTGATCTTTGCC                                        |
| R09B5.11      | 1551           | R09FOR<br>R09REV<br>R09intFOR<br>R09intREV     | ATGAACGCC GTTGTGCC<br>CCGACTATGAACATATCCG<br>GGTGCCAA TGTTCTTACC<br>CGTAAGAAACATTGGCACC                   |
| C35A11.4      | 1548           | C35FOR<br>C35REV<br>C35intFOR<br>C35intREV     | ATGGTGAAGCACCCAGTTTCCG<br>CTAGAGTCGATAAGATAAGG<br>CTGTGAGATTGATGAAGCC<br>GGCTTCATCAATCTCACAG              |
| F14E5.1       | 1419           | F14FOR<br>F14REV<br>F14intFOR<br>F14intREV     | ATGTCAAATAGATTGTGGCC<br>TCATTTTTTTAAGTTCATT<br>GGAGATGGTACAGATGC<br>GCATCTGTACCATCTCC                     |
| Y39E4B.5      | 1518           | Y39FOR<br>Y39REV<br>Y39intFOR<br>Y39intREV     | ATGCGGTGGCAAACGATTCG<br>TTAGTAAATCGAAGATGTC<br>CATGAGCGAATATCAAGCC<br>GGCTTGATTCGCTCATG                   |
| F48E3.2       | 1467           | F48FOR<br>F48REV<br>F48intFOR<br>F48intREV     | CCAGTGACAACATGCAAAAACCTAATTGG<br>GGCTGTATTATAATTATTCAITCC<br>CGTCGTGGGTTTTTTGTTGGG<br>CCCAACAAAACCCACGACG |
| K09C4.5       | 1575           | K4.5FOR<br>K4.5REV<br>K4.5intFOR<br>K4.5intREV | CCATTAGCAATCATGTATTCAATGCGCC<br>GGCAATGAAGCAAGCAACATCGCAGG<br>GGAGAAGAATTTGACACAGG<br>CCTGTGTCAAATCTTCTCC |
| T08B1.1       | 1776           | T08FOR<br>T08REV<br>T08intFOR<br>T08intREV     | ATGTCAGAATTGAAGAAG<br>CAGTCTTCTTCCACATTGG<br>CGTCCTGACCTACGCTATGG<br>CCATAGCGTAGGTCAGGACC                 |

**Table S2 Insertion sites for the exofacial HA tag in putative *C. elegans* transporters**

The influenza HA epitope (peptide sequence, IDYPYDVPDYAE) was introduced using the sense oligonucleotide: 5'-TGAGATCGATTATCCTTATGATGTTCTGATTATGC-3' and the antisense oligonucleotide: 5'-TCAGCATAATCAGGAACATCATAAGGATAATCGATC-3'. A specific restriction enzyme site (Bsu36I) was created by site-directed mutagenesis (at the position indicated in the Table) so that the sticky ends could be produced after the digestion. Subsequently the HA tag was ligated into the sequence with correct orientation. The consequent mutated amino acids for each protein are listed.

| Gene name | Position of the HA insertion         | Mutated amino acid                                                     |
|-----------|--------------------------------------|------------------------------------------------------------------------|
| H17B01.1a | Thr <sup>57</sup> -Glu <sup>58</sup> | –                                                                      |
| H17B01.1b | Pro <sup>70</sup> -Gly <sup>71</sup> | –                                                                      |
| R09B5.11  | Pro <sup>71</sup> -Gly <sup>72</sup> | –                                                                      |
| C35A11.4  | Met <sup>42</sup> -Asn <sup>43</sup> | Met <sup>42</sup> →Pro, Asn <sup>43</sup> →Asp                         |
| F14E5.1   | Thr <sup>55</sup> -Glu <sup>56</sup> | –                                                                      |
| Y39E4B.5  | Leu <sup>45</sup> -Arg <sup>46</sup> | Arg <sup>46</sup> →Ala, Gln <sup>47</sup> →Glu, Pro <sup>48</sup> →Ala |
| F48E3.2   | Asn <sup>42</sup> -Glu <sup>43</sup> | –                                                                      |
| K09C4.5   | Pro <sup>51</sup> -Thr <sup>52</sup> | Thr <sup>52</sup> →Ala                                                 |
| K09C4.1   | Thr <sup>54</sup> -Glu <sup>55</sup> | Thr <sup>54</sup> →Glu                                                 |
| T08B1.1   | Asp <sup>76</sup> -Trp <sup>77</sup> | Asp <sup>76</sup> →Glu, Trp <sup>77</sup> →Gly                         |

<sup>1</sup> Present address: Department of Histoembryology and Neurobiology, College of Basic and Forensic Medicine, Sichuan University, Chengdu, Sichuan, 610041, People's Republic of China.

<sup>2</sup> To whom correspondence should be addressed (email g.d.holman@bath.ac.uk).

The gene and protein names for *fgt-1a* and *fgt-1b* and FGT-1A and -1B have been deposited in WormBase (<http://www.wormbase.org>) under accession numbers NM\_061580.4 and NM\_061581.1 respectively.

**Table S3** Positions of charged residues in putative TM segments

Charged residues in putative TM segments were identified following sequence alignment (Figure S1). The Table includes charged residues within the central eight residues in the proposed TM regions, but excludes charged residues in the first or last three residues of the proposed helices. The membrane topology of each putative transporter was set up to maximize alignment with the hGLUT1 TM regions and at the same time taking account of the membrane topology predicted by the SOSUI program.

| Strain   | Putative charged residue positions in TM segments |                   |                   |                                         |                                         |                    |                                         |                                                              |                                                              |                                         |                    |      |
|----------|---------------------------------------------------|-------------------|-------------------|-----------------------------------------|-----------------------------------------|--------------------|-----------------------------------------|--------------------------------------------------------------|--------------------------------------------------------------|-----------------------------------------|--------------------|------|
|          | TM1                                               | TM2               | TM3               | TM4                                     | TM5                                     | TM6                | TM7                                     | TM8                                                          | TM9                                                          | TM10                                    | TM11               | TM12 |
| FGT-1A   |                                                   | Asp <sup>78</sup> |                   | Arg <sup>142</sup>                      |                                         |                    |                                         | Asp <sup>346</sup>                                           |                                                              |                                         |                    |      |
| FGT-1B   |                                                   | Asp <sup>96</sup> |                   | Arg <sup>160</sup>                      |                                         |                    |                                         | Asp <sup>364</sup>                                           |                                                              |                                         |                    |      |
| R09B5.11 | Asp <sup>61</sup>                                 | Asp <sup>97</sup> |                   | Arg <sup>161</sup>                      | Lys <sup>190</sup>                      |                    |                                         | Lys <sup>354</sup> , Asp <sup>366</sup>                      |                                                              |                                         |                    |      |
| C35A11.2 |                                                   |                   |                   | Arg <sup>124</sup>                      |                                         | Glu <sup>191</sup> | Asp <sup>297</sup>                      | Asp <sup>310</sup> , Asp <sup>328</sup> , Arg <sup>329</sup> |                                                              |                                         | Arg <sup>416</sup> |      |
| F14E5.1  |                                                   | Asp <sup>60</sup> |                   | Arg <sup>124</sup>                      | Glu <sup>159</sup> , Asp <sup>175</sup> |                    |                                         | Lys <sup>309</sup>                                           | Lys <sup>357</sup> , Arg <sup>359</sup>                      |                                         |                    |      |
| Y39E4B.5 |                                                   |                   |                   | Arg <sup>122</sup> , Asp <sup>133</sup> | Glu <sup>157</sup> , Lys <sup>175</sup> | Arg <sup>182</sup> |                                         | Asp <sup>324</sup> , Arg <sup>325</sup>                      |                                                              |                                         | Asp <sup>418</sup> |      |
| F48E3.2  |                                                   | Glu <sup>57</sup> |                   | Arg <sup>121</sup>                      | Glu <sup>156</sup>                      |                    | Arg <sup>266</sup> , Asp <sup>290</sup> | Lys <sup>304</sup>                                           |                                                              |                                         |                    |      |
| K09C4.5  | Asp <sup>20</sup>                                 |                   | Arg <sup>97</sup> | Arg <sup>134</sup>                      | Asp <sup>162</sup>                      |                    | Asp <sup>273</sup>                      | Asp <sup>319</sup> , Arg <sup>311</sup>                      | Lys <sup>338</sup>                                           | Glu <sup>365</sup> , Glu <sup>369</sup> |                    |      |
| K09C4.1  | Asp <sup>20</sup>                                 | Glu <sup>70</sup> | Arg <sup>97</sup> |                                         | Lys <sup>166</sup>                      | Glu <sup>191</sup> | Asp <sup>281</sup> , Asp <sup>292</sup> | Asp <sup>327</sup> , Lys <sup>319</sup>                      | Lys <sup>342</sup> , Lys <sup>345</sup> , Glu <sup>354</sup> | Glu <sup>373</sup> , Arg <sup>388</sup> |                    |      |

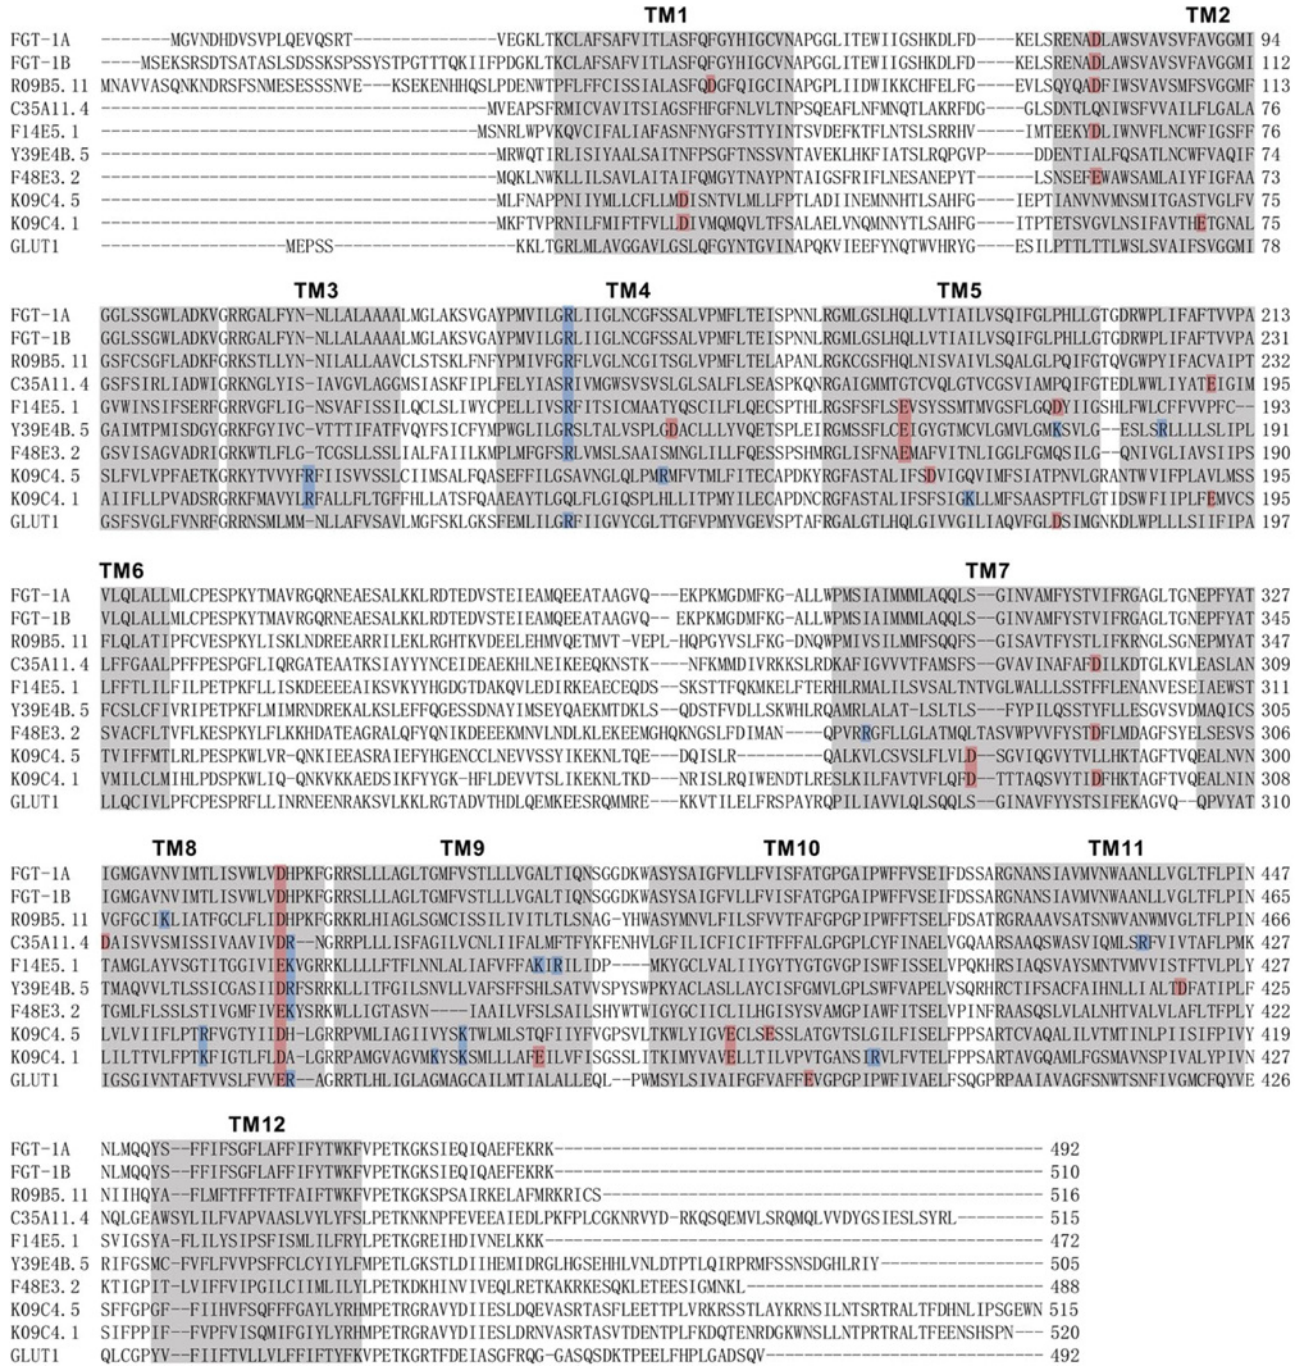

Figure S1 Alignments of GLUT1 with putative transporters cloned from *C. elegans*

Many of the putative *C. elegans* transporters have charged residues (blue and red shading) in regions that correspond to the mammalian GLUT protein TM regions. We propose that this property may be associated with poor ability to facilitate glucose transport and that the property is likely to be more associated with alternative transported substrates.

Received 16 August 2013/10 September 2013; accepted 11 September 2013  
 Published as BJ Immediate Publication 11 September 2013, doi:10.1042/BJ20131101
